# Supplementary material
Source: Research Square preprint supplement (doi:10.21203/rs.3.rs-9624514/v1)
Supplement: Supplementary file 1 [file ad96030283b8011b685455cf.docx]

**Supplementary Material**

**Supplementary Table 1.** Social responses experienced by farmers who have never shot kangaroos following disclosure of their decision. Mean scores with 95% confidence intervals are reported for two sets of items: (i) the frequency with which respondents experienced specific social reactions after others became aware of their decision not to shoot kangaroos (0 = never, 4 = always), and (ii) agreement with statements regarding social environment and personal wellbeing following disclosure (−2 = strongly disagree, +2 = strongly agree). Percentages indicate the proportion of respondents reporting frequent reactions (often/always) or agreement (agree/strongly agree). For frequencies, non‑disclosure was calculated at the item level and includes respondents who either selected “I haven’t told anyone / no one knows” or did not report that specific reaction; these cases were excluded from mean and confidence‑interval calculations but are reported separately as percentages. Items are ordered within sections by mean score (highest to lowest).

| Block | Label | Mean | SE | 95% CI  (lower) | 95% CI  (upper) | % | % Not disclosed |
| --- | --- | --- | --- | --- | --- | --- | --- |
| Frequency | Household members or close friends support my decision | 3.31 | 0.177 | 2.96 | 3.65 | 80.6 | 0 |
| Frequency | Neighbours and nearby farmers react positively | 2.18 | 0.196 | 1.8 | 2.57 | 45.5 | 8.3 |
| Frequency | I receive compliments or friendly questions | 1.8 | 0.191 | 1.42 | 2.18 | 22.9 | 2.8 |
| Frequency | Other farmers or landowners follow my example | 1.65 | 0.178 | 1.3 | 2 | 20.6 | 5.6 |
| Frequency | My family or I are targeted with bullying or intimidation | 1.14 | 0.187 | 0.77 | 1.51 | 11.1 | 0 |
| Frequency | I receive threats from people in my community | 0.83 | 0.171 | 0.5 | 1.17 | 8.3 | 0 |
| Agreement | My family and I are treated differently by the community | -1.04 | 0.247 | -1.52 | -0.55 | 7.4 | NA |
| Agreement | I have become isolated from my community | -1.13 | 0.247 | -1.62 | -0.65 | 10 | NA |
| Agreement | I experience social tension due to my decision | -1.21 | 0.259 | -1.72 | -0.71 | 10.7 | NA |
| Agreement | I am concerned about the safety of myself or my family | -1.36 | 0.250 | -1.85 | -0.87 | 8 | NA |
| Agreement | Pressure from others has made me reconsider my decision | -1.59 | 0.153 | -1.89 | -1.29 | 0 | NA |

**Supplementary Table 2.** Comparison of reported impacts of kangaroo activity between current shooters and farmers who have never shot kangaroos. Mean experience scores with 95% confidence intervals are shown for eight categories of impacts associated with kangaroo activity, reported separately for farmers who currently shoot kangaroos and those who have never shot kangaroos. Responses were recorded on a five‑point scale (0 = none at all; 4 = a great deal). Sample sizes (n) reflect the number of respondents reporting on each impact. p‑values are from item‑level Wilcoxon rank‑sum tests comparing management groups, with adjustment for multiple comparisons.

| Impact | Management | Mean | 95% CI  (lower) | 95% CI  (upper) | n | *p* |
| --- | --- | --- | --- | --- | --- | --- |
| Impacts to fences or property | Currently shoot | 3.159 | 2.923 | 3.394 | 63 | 0.000 |
| Impacts to fences or property | Never shot | 1.750 | 1.381 | 2.119 | 36 | 0.000 |
| Effects on native vegetation | Currently shoot | 3.000 | 2.702 | 3.298 | 63 | 0.000 |
| Effects on native vegetation | Never shot | 1.389 | 1.004 | 1.774 | 36 | 0.000 |
| Decreased ground cover | Currently shoot | 3.143 | 2.893 | 3.393 | 63 | 0.000 |
| Decreased ground cover | Never shot | 1.611 | 1.161 | 2.062 | 36 | 0.000 |
| Overgrazing | Currently shoot | 3.207 | 2.948 | 3.465 | 58 | 0.000 |
| Overgrazing | Never shot | 1.455 | 0.896 | 2.013 | 22 | 0.000 |
| Road safety hazards | Currently shoot | 2.857 | 2.570 | 3.144 | 63 | 0.000 |
| Road safety hazards | Never shot | 1.889 | 1.500 | 2.278 | 36 | 0.000 |
| Loss of crops | Currently shoot | 3.333 | 2.943 | 3.724 | 21 | 0.001 |
| Loss of crops | Never shot | 1.500 | 0.770 | 2.230 | 10 | 0.001 |
| Impacts to water facilities | Currently shoot | 1.841 | 1.491 | 2.191 | 63 | 0.007 |
| Impacts to water facilities | Never shot | 1.083 | 0.660 | 1.507 | 36 | 0.007 |
| Impacts to gardens or landscaping | Currently shoot | 2.016 | 1.691 | 2.340 | 63 | 0.066 |
| Impacts to gardens or landscaping | Never shot | 1.500 | 1.055 | 1.945 | 36 | 0.066 |
